# Supplementary material
Source: publisher site journal article supplement (https://www.spandidos-publications.com/4120/downloadSupplementary)
Supplement: Supplementary file 1 [file downloadSupplementary]

## Sheet: MG
Table SI. Row datas of clinical characteristics.
number	Gender	Age(year)	Course of disease (month)	Neostigmine	AchR-Ab	MuSK-Ab	Dysphagia	Chewing weakness	Thymectomy	Thyroid dysfunction	WBC（1.0E+9/L）	RBC（1.0E+12/L）	PLT（1.0E+9/L）	Hb（g/L）
1	female	36	6	+	-	-	+	-	+	-	6.65	4.53	239	138
2	male	21	3	+	+	+	+	+	+	-	23.65	4.85	221	138
3	female	53	30	+	+	+	+	-	-	-	13.58	3.98	258	117
4	male	58	14	+	+	+	+	+	-	+	3.34	4.51	190	102
5	female	44	48	+	+	-	-	-	-	+	12.91	4.91	244	129
6	male	44	7	+	+	-	+	-	-	-	6.54	4.21	254	123
7	female	45	1	+	+	+	+	-	-	-	7.09	5.7	299	131
8	male	45	5	+	+	+	-	+	-	-	5.63	4.2	171	139
9	female	33	9	+	+	-	-	-	-	-	6.13	4.55	240	99
10	female	38	120	+	+	+	+	+	-	-	11.38	4.96	253	133
11	female	23	24	+	+	+	-	-	-	+	11.13	4.8	161	142
12	female	63	96	+	+	-	-	+	+	-	10.14	5.27	263	134
13	male	66	60	+	+	-	-	-	-	-	5.7	5.15	214	158
14	male	53	132	+	-	+	+	-	-	-	15.84	5.14	238	154
15	female	34	24	+	+	+	+	-	-	-	7.72	4.63	239	142
16	female	36	6	+	+	-	+	-	+	-	15.65	5.21	265	111
17	female	30	48	+	+	-	+	+	+	-	5.2	4.41	195	119
18	female	58	6	+	+	+	-	-	+	+	4.8	4.53	191	138
19	female	17	5	+	+	+	+	-	-	-	9.85	4.58	157	150
20	male	76	5	+	+	+	-	-	+	-	7.29	4.1	239	127
21	female	44	5	+	+	+	+	+	+	-	6.52	5.2	212	158
22	male	44	8	+	+	-	-	+	-	+	6.43	4.83	173	153
23	male	39	6	+	-	+	+	-	+	-	9.12	3.95	188	120
24	female	49	6	+	+	+	+	-	-	-	10.51	4.32	203	128
25	male	29	5	+	+	+	-	-	-	-	4.34	3.99	183	126
26	female	19	3	+	+	+	+	-	+	-	9.94	4.15	165	119
27	female	18	4	+	+	+	-	+	+	-	7.69	4.55	156	135
28	female	48	50	+	+	+	-	-	-	-	8.44	3.8	269	113
29	male	52	16	+	+	-	-	-	+	-	8.18	4.19	313	108
30	male	61	61	+	+	+	+	-	-	-	4.77	3.72	201	115
31	female	55	60	+	-	-	-	-	+	+	11.63	4.36	266	119
32	female	51	17	+	+	+	+	-	+	-	14.12	4.22	299	122
33	female	35	86	+	+	-	+	-	-	+	7.51	4.36	239	134
34	female	35	24	+	+	-	-	-	+	-	8.9	4.78	258	144
35	female	27	21	+	+	+	+	+	+	+	9.1	3.79	231	100
36	male	47	48	+	+	+	-	-	+	-	6.52	3.99	171	137
37	male	41	36	+	-	+	-	-	-	-	8.95	5.08	150	162
38	female	58	72	+	+	-	-	-	+	-	6.53	5.21	170	146
39	male	31	16	+	+	-	-	-	+	-	11.35	4.57	211	142
40	female	58	84	+	+	-	+	-	+	-	9.62	2.5	172	78
41	female	41	36	+	+	+	+	-	+	-	14.17	5.24	263	157
42	female	64	85	+	+	+	-	-	+	-	14.91	5.69	258	164
43	female	32	16	+	+	-	+	+	+	-	10.09	4.87	292	143
44	male	40	7	+	+	+	-	-	-	-	12.37	4.82	256	144
45	male	23	5	+	+	-	+	-	+	-	5.71	5.73	251	124
46	male	53	36	+	+	-	-	-	+	-	7.14	3.5	416	87
47	male	52	18	+	+	+	-	-	-	+	10.37	4.01	275	128
48	female	41	7	+	+	-	-	-	+	+	11.5	4.59	234	139
49	female	44	4	+	+	+	+	-	+	-	16.94	3.83	228	126
50	female	25	9	+	-	+	-	-	+	-	7.67	4.45	204	135

## Sheet: Control
Number	Gender	Age(year)
1	male	27
2	female	27
3	male	26
4	female	23
5	female	24
6	female	26
7	male	26
8	male	26
9	female	26
10	female	26
11	female	61
12	male	24
13	male	25
14	male	26
15	female	26
16	male	27
17	female	53
18	male	50
19	female	67
20	male	32
21	female	39
22	male	75
23	female	55
24	male	45
25	male	34
26	female	58
27	male	48
28	female	35
29	male	46
30	female	54
31	male	59
32	male	59
33	female	45
34	male	31
35	male	45
36	female	28
37	female	27
38	male	38
39	male	49
40	male	68
41	female	24
42	female	25
43	female	26
44	male	28
45	female	24
46	female	24
47	female	51
48	male	53
49	male	52
50	female	53
